# Supplementary material for: Association Between Use of Warfarin for Atrial Fibrillation and Outcomes Among Patients With End-Stage Renal Disease: A Systematic Review and Meta-analysis
Source: PubMed Central journal article supplement (PMC7136833; doi:10.1001/jamanetworkopen.2020.2175), 2020-04-06
Supplement: jamanetwopen-3-e202175-s001.pdf [file jamanetwopen-3-e202175-s001.pdf]

## Supplementary Online Content

Randhawa MS, Vishwanath R, Rai MP, et al. Association between use of warfarin for atrial fibrillation and outcomes among patients with end-stage renal disease: a systematic review and meta-analysis. *JAMA Netw Open*. 2020;3(4):e202175.

doi:10.1001/jamanetworkopen.2020.2175

**eTable 1.** Baseline Characteristics of the Study Population

**eTable 2.** Newcastle Ottawa Scale Assessment of the Studies

**eTable 3.** Definitions of Major Bleeding, Ischemic Strokes, and Hemorrhagic Strokes as Mentioned in the Selected Studies

**eTable 4.** Sensitivity Analysis With “Leave Out” Method and Measure of Heterogeneity Using Cochran’s Q and I<sup>2</sup> Results

This supplementary material has been provided by the authors to give readers additional information about their work.

**eTable 1.** Baseline Characteristics of the Study Population

| Authors                        | Mean age |         | Male (%) |         | Hypertension (%) |         | Diabetes Mellitus (%) |         | Coronary artery disease (%) |         | History of stroke (%) (I, H, NS)** |                     |
|--------------------------------|----------|---------|----------|---------|------------------|---------|-----------------------|---------|-----------------------------|---------|------------------------------------|---------------------|
|                                | Warfarin | Control | Warfarin | Control | Warfarin         | Control | Warfarin              | Control | Warfarin                    | Control | Warfarin                           | Control             |
| Chan et al <sup>8</sup>        | 72.6     | 71.3    | 57.8     | 54.4    | 79.7             | 79.8    | 40.6                  | 34.4    | 58.3                        | 52.9    | 14.4(NS)                           | 11.9(NS)            |
| Winkelmayer et al <sup>9</sup> | 68.6     | 70.1    | 42.6     | 42.5    | 82.7             | 80.7    | 60.2                  | 59.1    | 46.2                        | 53.0    | 29.9(NS)                           | 23.6(NS)            |
| Carrero et al <sup>10</sup>    | -        | -       | -        | -       | -                | -       | -                     | -       | -                           | -       | -                                  | -                   |
| Chen J et al <sup>11</sup>     | -        | -       | 41.5     | 46.3    | 81.0             | 83.1    | 45.9                  | 47.6    | 61.9                        | 54.9    | -                                  | -                   |
| Genovesi et al <sup>14</sup>   | -        | -       | 64.2     | 56.4    | 76.1             | 85.3    | 29.1                  | 33.3    | 45.5                        | 50.6    | 15.7(I),<br>11.9(H)                | 14.1(I),<br>26.3(H) |
| Shah et al <sup>12</sup>       | 75.3     | 75.1    | 61.0     | 61.0    | 77.0             | 75.0    | 44.0                  | 39.0    | 62.0                        | 59.0    | 6.0(NS)                            | 5.0(NS)             |
| Wakasugi et al <sup>13</sup>   | 67.8     | 68.4    | 57       | 72      | 43               | 28      | 18                    | 28      | -                           | -       | 14(I)                              | 26(I)               |
| Shen et al <sup>15</sup>       | 61.2     | 62.1    | 49.7     | 48.7    | 97.2             | 98.6    | 69.1                  | 70.8    | 37.0                        | 42.6    | 22.0(NS)                           | 26.8(NS)            |
| Garg et al <sup>16</sup>       | 75       | 78      | 55.4     | 51.3    | 84.8             | 88.0    | 58.8                  | 55.1    | 77.3                        | 80.9    | 20.1(I)                            | 23.0(I)             |
| Wang et al <sup>17</sup>       | 59.8     | 62.1    | 61       | 62.2    | 98.3             | 89.0    | 66.1                  | 54.9    | 71.2                        | 72.0    | 27.1(NS)                           | 15.9(NS)            |
| Kai et al <sup>20</sup>        | 69.2     | 67.3    | 63.2     | 58.9    | 99.2             | 99.0    | 79.2                  | 77.9    | 55.1                        | 49.5    | 24.0(I),<br>1.3(H)                 | 25.2(I),<br>2.5(H)  |
| Lee et al <sup>22</sup>        | 69.3     | 70.3    | 42.3     | 40.6    | -                | -       | -                     | -       | -                           | -       | 6.8(NS)                            | 5.9(NS)             |
| Tan et al <sup>19</sup>        | 74.4     | 74.7    | 43       | 43.2    | 98.4             | 98.6    | 70.7                  | 71.6    | 65.9                        | 66.4    | 21.0(NS)                           | 21.6(NS)            |
| Yoon et al <sup>21</sup>       | 67.8     | 66.1    | 59.9     | 57.5    | 89.4             | 79.2    | 43.1                  | 35.9    | -                           | -       | -                                  | -                   |
| Voskamp et al <sup>23</sup>    | 67.6     | 61.3    | 59.8     | 61.6    | 88.1             | 89.1    | 17.6                  | 15.8    | 59.0                        | 31.7    | -                                  | -                   |

\*\*Where 'I' is ischemic, 'H' is hemorrhagic and 'NS' is not specified

**eTable 2.** Newcastle Ottawa Scale Assessment of the Studies

| <i>Study</i>                         | <i>Selection</i> | <i>Compatibility</i> | <i>Outcomes</i> |
|--------------------------------------|------------------|----------------------|-----------------|
| <b>Chan et al<sup>8</sup></b>        | ****             | -                    | *               |
| <b>Winkelmayer et al<sup>9</sup></b> | ****             | *                    | **              |
| <b>Carrero et al<sup>10</sup></b>    | **               | -                    | -               |
| <b>Chen J et al<sup>11</sup></b>     | ****             | *                    | **              |
| <b>Genovesi et al<sup>14</sup></b>   | ****             | **                   | ***             |
| <b>Shah et al<sup>12</sup></b>       | ***              | *                    | *               |
| <b>Wakasugi et al<sup>13</sup></b>   | ****             | **                   | ***             |
| <b>Shen et al<sup>15</sup></b>       | ****             | *                    | ***             |
| <b>Garg et al<sup>16</sup></b>       | ****             | *                    | ***             |
| <b>Wang et al<sup>17</sup></b>       | ****             | **                   | ***             |
| <b>Kai et al<sup>20</sup></b>        | ****             | *                    | ***             |
| <b>Lee et al<sup>22</sup></b>        | ****             | *                    | ***             |
| <b>Tan et al<sup>19</sup></b>        | ****             | *                    | -               |
| <b>Yoon et al<sup>21</sup></b>       | ****             | *                    | ***             |
| <b>Voskamp et al<sup>23</sup></b>    | ****             | **                   | ***             |

**eTable 3.** Definitions of Major Bleeding, Ischemic Strokes, and Hemorrhagic Strokes as Mentioned in the Selected Studies

| Definition of Major Bleeding     |                   |                                                                                                                                               |
|----------------------------------|-------------------|-----------------------------------------------------------------------------------------------------------------------------------------------|
| Defined as                       | Number of Studies | Studies                                                                                                                                       |
| Hospitalization/transfusion      | 5                 | Carrero et al <sup>10</sup> , Wakasugi et al <sup>13</sup> , Shen et al <sup>15</sup> , Garg et al <sup>16</sup> , Wang et al <sup>17</sup> . |
| Internal bleeding                | 2                 | Winkelmayer et al <sup>9</sup> , Shah et al <sup>12</sup> .                                                                                   |
| Not defined                      | 1                 | Genovesi et al <sup>14</sup> .                                                                                                                |
|                                  |                   |                                                                                                                                               |
| Definition of Ischemic Stroke    |                   |                                                                                                                                               |
| Defined as                       | Number of Studies | Studies                                                                                                                                       |
| ICD codes                        | 5                 | Winkelmayer et al <sup>9</sup> , Chen J et al <sup>11</sup> , Lee et al <sup>22</sup> , Tan et al <sup>19</sup> , Yoon et al <sup>21</sup> .  |
| Clinical evidence                | 2                 | Wakasugi et al <sup>13</sup> , Garg et al <sup>16</sup> .                                                                                     |
| Others                           | 3                 | Chan et al <sup>8</sup> , Shah et al <sup>12</sup> , Kai et al <sup>20</sup>                                                                  |
| Not defined                      | 1                 | Shen et al <sup>15</sup>                                                                                                                      |
|                                  |                   |                                                                                                                                               |
| Definition of Hemorrhagic Stroke |                   |                                                                                                                                               |
| Defined as                       | Number of Studies | Studies                                                                                                                                       |
| ICD codes                        | 3                 | Winkelmayer et al <sup>9</sup> , Lee et al <sup>22</sup> , Yoon et. Al <sup>21</sup>                                                          |
| Radiographic evidence            | 1                 | Wang et al <sup>17</sup>                                                                                                                      |
| Others                           | 2                 | Chan et al <sup>8</sup> , Shah et al <sup>12</sup>                                                                                            |
| Not defined                      | 1                 | Shen et al <sup>15</sup>                                                                                                                      |

**eTable 4.** Sensitivity Analysis With “Leave Out” Method and Measure of Heterogeneity Using Cochran’s Q and I<sup>2</sup> Results

|                                  | <i>Sensitivity Analysis</i>                                                     |                                                                                             |                                                                                                                                 |                                                                                                                          | <i>Measures of heterogeneity</i> |                          |                               |                        |
|----------------------------------|---------------------------------------------------------------------------------|---------------------------------------------------------------------------------------------|---------------------------------------------------------------------------------------------------------------------------------|--------------------------------------------------------------------------------------------------------------------------|----------------------------------|--------------------------|-------------------------------|------------------------|
|                                  | <i>Remove Winkelmaye’s et al<sup>10</sup> &amp; Wakasugi et al<sup>11</sup></i> | <i>Remove Shen et al<sup>15</sup>, Shah et al<sup>12</sup> &amp; Lee et al<sup>22</sup></i> | <i>Remove Wakasugi et al<sup>11</sup>, Winkelmaye et al<sup>10</sup>, Chan et al<sup>9</sup>, &amp; Shen et al<sup>15</sup></i> | <i>Remove Tan et al<sup>19</sup>, Wakasugi et al<sup>11</sup>, Shah et al<sup>12</sup> &amp; Yoon et al<sup>21</sup></i> | <i>Cochran’s Q (p-value)</i>     | <i>I<sup>2</sup> (%)</i> | <i>Modified H<sup>2</sup></i> | <i>Tau<sup>2</sup></i> |
| <b><i>Ischemic Stroke</i></b>    | 0.95 (0.81-1.12)                                                                | 0.997 (0.85 - 1.17)                                                                         | 0.97 (0.81 – 1.57)                                                                                                              | 0.948 (0.796 – 1.13)                                                                                                     | 21.09 (0.02)                     | 52.60%                   | 1.109                         | 0.034                  |
| <b><i>Hemorrhagic Stroke</i></b> | 1.35 (0.95-1.92)                                                                | 1.55 (1.08 -2.21)                                                                           | 1.38 (0.95 – 1.99)                                                                                                              | 1.49 (0.917 – 2.45)                                                                                                      | 9.53 (0.146)                     | 37.00%                   | 0.588                         | 0.0686                 |
| <b><i>Major Bleeding</i></b>     | 1.25 (1.01-1.55)                                                                | 1.16 (0.914 -1.488)                                                                         | 1.24 (0.99 – 1.54)                                                                                                              | 1.21 (0.986 – 1.49)                                                                                                      | 23.54 (0.003)                    | 66.00%                   | 1.943                         | 0.0465                 |
| <b><i>Mortality</i></b>          | 0.94 (0.81-1.08)                                                                | 0.94 (0.9 -1.94)                                                                            | 0.95 (0.83 – 1.09)                                                                                                              | 0.99 (0.877 – 1.12)                                                                                                      | 54.56 (<0.01)                    | 85.30%                   | 5.82                          | 0.0301                 |
